## Index of Authors and Titles

- AKHURST, R. J., LEHNERT, S. A., FAISSNER, A. *and* DUFFIE, E.  
TGF beta in murine morphogenetic processes: the early  
embryo and cardiogenesis 645
- ALBERSHEIM, P. *See* MOHNEN, D.
- ALLEN, F., TICKLE, C. *and* WARNER, A. The role of gap  
junctions in patterning of the chick limb bud 623
- ALLES, A. J. *and* SULIK, K. K. Retinoic acid-induced spina  
bifida: evidence for a pathogenetic mechanism 73
- ANTICA, M. *See* SPAVENTI, R.
- AVILA, J. *See* CASAL, J.
- AWGULEWITSCH, A. *and* JACOBS, D. Differential expression of  
Hox 3.1 protein in subregions of the embryonic and adult  
spinal cord 411
- AYER-LELIÈVRE, C. *See* HALLBÖÖK, F.
- BALLING, R. *See* PUSCHEL, A. W.
- BARBET, J. P. *See* SOUSSI-YANICOSTAS, N.
- BARTON, P. *See* SOUSSI-YANICOSTAS, N.
- BARTON, S. C. *See* FUNDELE, R. H.
- BASTMEYER, M., SCHLOSSHAUER, B. *and* STUERMER, C. A. O. The  
spatiotemporal distribution of N-CAM in the retinotectal  
pathway of adult gold fish detected by the monoclonal  
antibody D3 299
- BATE, M. *See* BROADIE, K. S.
- BATE, M. *See* SHEPHERD, D.
- BELLAIRS, R. *See* LOVELESS, W.
- BERRY, S. J. *See* KASTERN, W. H.
- BIENZ, M. *See* DELORENZI, M.
- BLECHER, S. R. *See* KAPALANGA, J.
- BONCINELLI, E. *See* OUDEJANS, C. B. M.
- BROADIE, K. S., SYLWESTER, A. W., BATE, M. *and* TUBLITZ, N. J.  
Immunological, biochemical and physiological analyses of  
carioacceleratory peptide 2 (CAP<sub>2</sub>) activity in the embryo  
of the tobacco hawkmoth *Manduca sexta* 59
- BRODERS, F. *See* LEVI, G.
- BRONNER-FRASER, M. *See* SERBEDZIJA, G. N.
- BUSSE, H. G. *See* SUNDIN, O. H.
- BUTLER-BROWNE, G. S. *See* SOUSSI-YANICOSTAS, N.
- CASAL, J., GONZALEZ, F., WANDOSELL, F., AVILA, J. *and*  
RIPOLL, P. Abnormal meiotic spindles cause a cascade of  
defects during spermatogenesis in *asp* males of  
*Drosophila* 251
- CHAMBON, P. *See* RUBERTE, E.
- CHAMPION, J. E. *See* McMAHON, A. P.
- CHARLEBOIS, T. S., SPENCER, D. H., TARKINGTON, S. K., HENRY,  
J. J. *and* GRAINGER, R. M. Isolation of a chick cytokeratin  
cDNA clone indicative of regional specialization in early  
embryonic ectoderm 33
- CLARK, M. E. *See* PETITTE, J. N.
- CLARK, P., CONNOLLY, P., CURTIS, A. S. G., DOW, J. A. T. *and*  
WILKINSON, C. D. W. Topographical control of cell  
behaviour: II. Multiple grooved substrata 635
- COLELLO, R. J. *and* GUILLERY, R. W. The early development of  
retinal ganglion cells with uncrossed axons in the mouse:  
retinal position and axonal course 515
- CONNOLLY, P. *See* CLARK, P.
- COOKE, J. *See* GREEN, J. B. A.
- CORNISH, J. A. *See* SCHULZ, R. A.
- COULY, G. *and* LE DOUARIN, N. M. Head morphogenesis in  
embryonic avian chimeras: evidence for a segmental  
pattern in the ectoderm corresponding to the  
neuromeres 543
- CURTIS, A. S. G. *See* CLARK, P.
- DARVILL, A. *See* MOHNEN, D.
- DAVIDSON, E. H. How embryos work: a comparative view of  
diverse modes of cell fate specification 365
- DELORENZI, M. *and* BIENZ, M. Expression of *Abdominal-B*  
homeoproteins in *Drosophila* embryos 323
- DESIMONE, D. *See* SMITH, J. C.
- DOLLE, P. *See* RUBERTE, E.
- DOUBRAVA, N. *See* MOHNEN, D.
- DOW, J. A. T. *See* CLARK, P.
- DUBAND, J.-L. *and* THIERY, J. P. Spatial and temporal  
distribution of vinculin and talin in migrating avian neural  
crest cells and their derivatives 421
- DUFFIE, E. *See* AKHURST, R. J.
- DUNON, D. *See* LEVI, G.
- EASTER, S. S. *See* WILSON, S. W.
- EBENDAL, T. *See* HALLBÖÖK, F.
- EBERHARD, S. *See* MOHNEN, D.
- EDELMAN, G. M. *See* LEVI, G.
- EICHELE, G. *See* SUNDIN, O. H.
- ETCHES, R. J. *See* PETITTE, J. N.
- FAISSNER, A. *See* AKHURST, R. J.
- FEHLAU, M. *See* FUNDELE, R. H.
- FEIZI, T. *See* LOVELESS, W.
- FELSENFIELD, A. L., WALKER, C., WESTERFIELD, M., KIMMEL, C.  
*and* STREISINGER, G. Mutations affecting skeletal muscle  
myofibril structure in the zebrafish 443
- FFRENCH-CONSTANT, C. *See* ZUSMAN, S.
- FLEMING, S. *See* GARROD, D. R.
- FRASER, S. E. *See* SERBEDZIJA, G. N.
- FUNDELE, R. H., NORRIS, M. L., BARTON, S. C., FEHLAU, M.,  
HOWLETT, S. K., MILLS, W. E. *and* SURANI, M. A. Temporal  
and spatial selection against parthenogenetic cells during  
development of fetal chimeras 203
- GALEWSKY, S. *See* SCHULZ, R. A.
- GARROD, D. R. *and* FLEMING, S. Early expression of  
desmosomal components during kidney tubule  
morphogenesis in human and murine embryos 313
- GERHAUSER, D. *See* MODLINSKI, J. A.
- GODIN, I., WYLIE, C. C. *and* HEASMAN, J. Genital ridges exert  
long-range effects on mouse primordial germ cell numbers  
and direction of migration in culture 357
- GOLDHAMER, D. J. *See* ONDA, H.
- GOLLIN, D. J. *See* MOHNEN, D.
- GONZALEZ, F. *See* CASAL, J.
- GRAF, J.-D. *See* ROBERT, J.
- GRAINGER, R. M. *See* CHARLEBOIS, T. S.
- GREEN, J. B. A., HOWES, G., SYMES, K., COOKE, J. *and* SMITH, J.  
C. The biological effects of XTC-MIF: quantitative  
comparison with *Xenopus* bFGF 173
- GRIFFITH, C. M. *and* WILEY, M. J. Sialoconjugates and  
development of the tail bud 479
- GRUBER, T. A. *See* MOHNEN, D.
- GRUSS, P. *See* PUSCHEL, A. W.
- GUDAS, L. J. *See* SUNDIN, O. H.
- GUILLERY, R. W. *See* COLELLO, R. J.
- HALLBÖÖK, F., AYER-LELIÈVRE, C., EBENDAL, T. *and* PERSSON,  
H. Expression of nerve growth factor receptor mRNA  
during early development of the chicken embryo:  
emphasis on cranial ganglia 693

- HALLONET, M. E. R., TEILLET, M.-A. *and* LE DOUARIN, N. M. A new approach to the development of the cerebellum provided by the quail-chick marker system 19
- HARBERS, K. *See* SCHWARZ, M.
- HARVEY, R. P. The *Xenopus MyoD* gene: an unlocalised maternal mRNA predates lineage-restricted expression in early embryo 669
- HEASMAN, J. *See* GODIN, I.
- HENRY, J. J. *See* CHARLEBOIS, T. S.
- HILL, D. P. *and* STROME, S. Brief cytochalasin-induced disruption of microfilaments during a critical interval in 1-cell *C. elegans* embryos alters the partitioning of developmental instructions to the 2-cell embryo 159
- HOMMA, S. *See* YAGINUMA, H.
- HOWES, G. *See* GREEN, J. B. A.
- HOWLETT, S. K. *See* FUNDELE, R. H.
- HYNES, R. O. *See* SMITH, J. C.
- HYNES, R. O. *See* ZUSMAN, S.
- ILLMENSEE, K. *See* MODLINSKI, J. A.
- ISHIHARA, R. *See* YAGINUMA, H.
- JACOBS, D. *See* AWGULEWITSCH, A.
- JACOBSON, A. G. *See* SATER, A. K.
- JJAKLI, H. *See* ROBERT, J.
- KAPALANGA, J. *and* BLECHER, S. R. Effect of the X-linked gene *Tabby (Ta)* on eyelid opening and incisor eruption in neonatal mice is opposite to that of epidermal growth factor 349
- KARCH, F. *See* ROBERT, J.
- KASTERN, W. H., WATSON, C. A. *and* BERRY, S. J. Maternal messenger RNA distribution in silkworm eggs I. Clone Ec4B is associated with the cortical cytoskeleton 497
- KELLY, F. J. *See* RICKETT, G. M. W.
- KIMMEL, C. B. *See* WARGA, R. M.
- KIMMEL, C. B., WARGA, R. M. *and* SCHILLING, T. F. Origin and organization of the zebrafish fate map 581
- KIMMEL, C. *See* FELSENFELD, A. L.
- KLEMM, U. *See* KRESS, H.
- KOBEL, H. R. *See* ROBERT, J.
- KRATOCHWIL, K. *See* SCHWARZ, M.
- KRESS, H., LUCKA, L., SWIDA, U., THUROFF, E. *and* KLEMM, U. Genes from two intermolt puffs in *Drosophila virilis* polytene chromosomes are differentially transcribed during larval development 261
- KRESS, H. *See* SWIDA, U.
- KRUST, A. *See* RUBERTE, E.
- LAURENT-WINTER, C. *See* SOUSSI-YANICOSTAS, N.
- LE DOUARIN, N. M. *See* COULY, G.
- LE DOUARIN, N. M. *See* HALLONET, M. E. R.
- LEHNERT, S. A. *See* AKHURST, R. J.
- LEVI, G., BRODERS, F., DUNON, D., EDELMAN, G. M. *and* THIERY, J. P. Thyroxine-dependent modulations of the expression of the neural cell adhesion molecule N-CAM during *Xenopus laevis* metamorphosis 681
- LIQI, B. *See* MODLINSKI, J. A.
- LIU, G. *See* PETITTE, J. N.
- LIVINGSTON, B. T. *and* WILT, F. H. Range and stability of cell fate determination in isolated sea urchin blastomeres 403
- LOVELESS, W., BELLAIRS, R., THORPE, S. J., PAGE, M. *and* FEIZI, T. Developmental patterning of the carbohydrate antigen FC10.2 during early embryogenesis in the chick 97
- LUCKA, L. *See* KRESS, H.
- LUCKA, L. *See* SWIDA, U.
- MARFA, V. *See* MOHNEN, D.
- McMAHON, A. P., CHAMPION, J. E., McMAHON, J. A. *and* SUKHATME, V. P. Developmental expression of the putative transcription *Egr-1* suggests that *Egr-1* and *c-fos* are coregulated in some tissues 281
- McMAHON, J. A. *See* McMAHON, A. P.
- MEIJER, C. J. L. M. *See* OUDEJANS, C. B. M.
- MELTON, D. A. *See* YISRAELI, J. K.
- MIKSCH, J. L. *See* SCHULZ, R. A.
- MILLS, W. E. *See* FUNDELE, R. H.
- MODLINSKI, J. A., GERHAUSER, D., LIQI, B., WINKING, H. *and* ILLMENSEE, K. Nuclear transfer from teratocarcinoma cells into mouse oocytes and eggs 337
- MOHNEN, D., EBERHARD, S., MARFA, V., DOUBRAVA, N., TOUBART, P., GOLLIN, D. J., GRUBER, T. A., NURI, W., ALBERSHEIM, P. *and* DARVILL, A. The control of root, vegetative shoot and flower morphogenesis in tobacco thin cell-layer explants (TCLs) 191
- MORRIS-KAY, G. *See* RUBERTE, E.
- NISHIDA, H. Determinative mechanisms in secondary muscle lineages of ascidian embryos: development of muscle-specific features in isolated muscle progenitor cells 559
- NORRIS, M. L. *See* FUNDELE, R. H.
- NURI, W. *See* MOHNEN, D.
- ONDA, H., GOLDHAMER, D. J. *and* TASSAVA, R. A. An extracellular matrix molecule of newt and axolotl regenerating limb blastemas and embryonic limb buds: immunological relationship of MT1 antigen with tenascin 657
- OPPENHEIM, R. W. *See* YAGINUMA, H.
- OUDEJANS, C. B. M., PANNESE, M., SIMEONE, A., MEIJER, C. J. L. M. *and* BONCINELLI, E. The three most downstream genes of the Hox-3 cluster are expressed in human extraembryonic tissues including trophoblast of androgenetic origin 471
- PAGE, M. *See* LOVELESS, W.
- PANNESE, M. *See* OUDEJANS, C. B. M.
- PARRET, T. *See* WILSON, S. W.
- PATEL-KING, R. S. *See* ZUSMAN, S.
- PATEL, R. *See* WHITAKER, M.
- PAVELIĆ, K. *See* SPAVENTI, R.
- PERSSON, H. *See* HALLBÖÖK, F.
- PETITTE, J. N., CLARK, M. E., LIU, G., VERRINDER GIBBINS, A. M. *and* ETCHES, R. J. Production of somatic and germline chimaeras in the chicken by transfer of early blastodermal cells 185
- PUSCHEL, A. W., BALLING, R. *and* GRUSS, P. Position-specific activity of the Hox1.1 promoter in transgenic mice 435
- RICKETT, G. M. W. *and* KELLY, F. J. Developmental expression of antioxidant enzymes in guinea pig lung and liver 331
- RIPOLL, P. *See* CASAL, J.
- ROBERT, J., WOLFF, J., JJAKLI, H., GRAF, J.-D., KARCH, F. *and* KOBEL, H. R. Developmental expression of the creatine kinase isozyme system of *Xenopus*: maternally derived CK-IV isoform persists far beyond the degradation of its maternal mRNA and into the zygotic expression period 507
- ROGERS, M. B. *See* SUNDIN, O. H.
- ROSS, L. S. *See* WILSON, S. W.
- RUBERTE, E., DOLLÉ, P., KRUST, A., ZELENT, A., MORRIS-KAY, G. *and* CHAMBON, P. Specific spatial and temporal distribution of retinoic acid receptor gamma transcripts during mouse embryogenesis 213

- RUIZ I ALTABA, A. Neural expression of the *Xenopus* homeobox gene *Xhox3*: evidence for a patterning neural signal that spreads through the ectoderm 595
- SATER, A. K. and JACOBSON, A. G. The role of the dorsal lip in the induction of heart mesoderm in *Xenopus laevis* 461
- SCHILLING, T. F. See KIMMEL, C. B.
- SCHLOSSHAUER, B. See BASTMEYER, M.
- SCHNABEL, H. See SCHNABEL, R.
- SCHNABEL, R. and SCHNABEL, H. Early determination in the *C. elegans* embryo: gene, *cib-1*, required to specify a set of stem-cell-like blastomeres 107
- SCHULZ, R. A., MIKSCH, J. L., XIE, X., CORNISH, J. A. and GALEWSKY, S. Expression of the *Drosophila gonadal* gene: alternative promoters control the germ-line expression of monocistronic and bicistronic gene transcripts 613
- SCHWARZ, M., HARBERS, K. and KRATOCHWIL, K. Transcription of a mutant collagen I gene is a cell type and stage-specific marker for odontoblast and osteoblast differentiation 717
- SERBEDZIJA, G. N., FRASER, S. E. and BRONNER-FRASER, M. Pathways of trunk neural crest cell migration in the mouse embryo as revealed by vital dye labelling 605
- SHEPHERD, D. and BATE, C. M. Spatial and temporal patterns of neurogenesis in the embryo of the locust (*Schistocerca gregaria*) 83
- SHIGA, T. See YAGINUMA, H.
- SIMEONE, A. See OUDEJANS, C. B. M.
- SMITH, J. C. See GREEN, J. B. A.
- SMITH, J. C., SYMES, K., HYNES, R. O. and DESIMONE, D. Mesoderm induction and the control of gastrulation in *Xenopus laevis*: the roles of fibronectin and integrins 229
- SOKOL, S. See YISRAELI, J. K.
- SOUSSEI-YANICOSTAS, N., BARBET, J. P., LAURENT-WINTER, C., BARTON, P. and BUTLER-BROWN, G. S. Transition of myosin isozymes during development of human masseter muscle. Persistence of developmental isoforms during postnatal stage 239
- SPAVENTI, R., ANTICA, M. and PAVELIĆ, K. Insulin and insulin-like growth factor I (IGF I) in early mouse embryogenesis 491
- SPENCER, D. H. See CHARLEBOIS, T. S.
- STREISINGER, G. See FELSENFELD, A. L.
- STROME, S. See HILL, D. P.
- STUERMER, C. A. O. See BASTMEYER, M.
- SUKHATME, V. P. See McMAHON, A. P.
- SULIK, K. K. See ALLES, A. J.
- SUNDIN, O. H., BUSSE, H. G., ROGERS, M. B., GUDAS, L. J. and EICHELE, G. Region-specific expression in early chick and mouse embryos of *Ghox-lab* and *Hox 1.6*, vertebrate homeobox-containing genes related to *Drosophila labial* 47
- SURANI, M. A. See FUNDELE, R. H.
- SWIDA, U., LUCKA, L. and KRESS, H. Glue protein genes in *Drosophila virilis*: their organization, developmental control of transcription and specific mRNA degradation 269
- SWIDA, U. See KRESS, H.
- SYLWESTER, A. W. See BROADIE, K. S.
- SYMES, K. See GREEN, J. B. A.
- SYMES, K. See SMITH, J. C.
- TAKEUCHI, S. See TANAKA, S.
- TAKEUCHI, T. See TANAKA, S.
- TANAKA, S., YAMAMOTO, H., TAKEUCHI, S. and TAKEUCHI, T. Melanization in albino mice transformed by introducing clones mouse *tyrosinase* gene 223
- TARKINGTON, S. K. See CHARLEBOIS, T. S.
- TASSAVA, R. A. See ONDA, H.
- TAYLOR, J. S. H. The directed growth of retinal axons towards surgically transposed tecta in *Xenopus*; and examination of homing behaviour by retinal ganglion cell axons 147
- TEILLET, M.-A. See HALLONET, M. E. R.
- THIERY, J. P. See DUBAND, J.-L.
- THIERY, J. P. See LEVI, G.
- THORPE, S. J. See LOVELESS, W.
- THUROFF, E. See KRESS, H.
- TICKLE, C. See ALLEN, F.
- TOUBART, P. See MOHNEN, D.
- TUBLITZ, N. J. See BROADIE, K. S.
- VERRINDER GIBBINS, A. M. See PETITTE, J. N.
- WALKER, C. See FELSENFELD, A. L.
- WANDOSELL, F. See CASAL, J.
- WARGA, R. M. and KIMMEL, C. B. Cell movements during epiboly and gastrulation in zebrafish 569
- WARGA, R. M. See KIMMEL, C. B.
- WARNER, A. See ALLEN, F.
- WASSERMAN, P. M. Profile of a mammalian sperm receptor 1
- WATSON, C. A. See KASTERN, W. H.
- WESTERFIELD, M. See FELSENFELD, A. L.
- WHITAKER, M. and PATEL, R. Calcium and cell cycle control 525
- WILEY, M. J. See GRIFFITH, C. M.
- WILKINSON, C. D. W. See CLARK, P.
- WILSON, S. W., ROSS, L. S., PARRETT, T. and EASTER, S. S. The development of a simple scaffold of axon tracts in the brain of the embryonic zebrafish, *Brachydanio rerio* 121
- WILT, F. H. See LIVINGSTON, B. T.
- WINKING, H. See MODLINSKI, J. A.
- WOLFF, J. See ROBERT, J.
- WYLIE, C. C. See GODIN, I.
- XIE, X. See SCHULZ, R. A.
- YAGINUMA, H., SHIGA, T., HOMMA, S., ISHIHARA, R. and OPPENHEIM, R. W. Identification of early developing axon projections from spinal interneurons in the chick embryo with a neuron-specific  $\beta$ -tubulin antibody: evidence for a new 'pioneer' pathway in the spinal cord 705
- YAMAMOTO, H. See TANAKA, S.
- YISRAELI, J. K., SOKOL, S. and MELTON, D. A. A two-step model for the localization of maternal mRNA in *Xenopus* oocytes: Involvement of microtubules and microfilaments in the translocation and anchoring of *Vg1* mRNA 289
- ZELENT, A. See RUBERTE, E.
- ZUSMAN, S., PATEL-KING, R. S., FFRENCH-CONSTANT, C. and HYNES, R. O. Requirements for integrins during *Drosophila* development 391
